# Supplementary material for: Plastome Sequences Help to Resolve Deep-Level Relationships of Populus in the Family Salicaceae
Source: Front Plant Sci. 2019 Jan 22;10:5. doi: 10.3389/fpls.2019.00005 (PMC6349946; doi:10.3389/fpls.2019.00005)
Supplement: Supplementary file 1 [file Table_1.xlsx]

## Sheet: Table S1
Table S1. List of genes in the chloroplast genomes
Category of genes	Group of genes	Name of genes
Photosynthesis-related genes	Rubisco	rbcL
	Photosystem I	psaA psaB psaC psaI psaJ
	Assembly and stability of Photosystem I	ycf3** ycf4
	Photosystem II	psbA psbB psbC psbD psbE psbF psbH psbI psbJ psbK psbL psbM psbN psbT psbZ
	ATP synthase	atpA atpB atpE atpF* atpH atpI
	Cytochrome b/f complex	petA petB* petD petG petL petN
	Cytochrome c synthesis	ccsA
	NADPH dehydrogenase	ndhA* ndhB*(2) ndhC ndhD ndhE ndhF ndhG ndhH ndhI ndhJ ndhK
Transcription and translation-related genes	Transcription	rpoA rpoB rpoC1* rpoC2
	Ribosomal proteins	rpl2*(2) rpl14 rpl16 rpl20 rpl22 rpl23(2) rpl33 rpl36 rps2 rps3 rps4 rps7(2) rps8 rps11 rps12 rps14 rps15 rps18 rps19(2)
RNA genes	Ribosomal RNA	rrn4.5 rrn5 rrn16 rrn23
	Transfer RNA	trnA-UGC(2) trnC-GCA trnD-GUC trnE-UUC trnF-GAA trnfM-CAU trnG-GCC trnG-UCC trnH-GUG trnI-CAU(2) trnI-GAU(2) trnK-UUU trnL-CAA(2) trnL-UAG trnL-UAA trnM-CAU trnN-GUU(2) trnP-UGG trnQ-UUG trnR-ACG(2) trnR-UCU trnS-GCU trnS-GGA trnS-UGA trnT-GGU trnT-UGU trnV-GAC(2) trnV-UAC trnW-CCA trnY-GUA
Other genes	RNA processing	matK
	Carbon metabolism	cemA
	Fatty acid synthesis	accD
	Proteolysis	clpP
Genes of unknown function	Conserved reading frames	ycf1 ycf2(2) ycf15(2)
(2) following gene indicate 2 copies; one and two asterisks incicated one- and two-intron containing genes, respectively.
