# Supplementary material for: Plastome Sequences Help to Resolve Deep-Level Relationships of Populus in the Family Salicaceae
Source: Front Plant Sci. 2019 Jan 22;10:5. doi: 10.3389/fpls.2019.00005 (PMC6349946; doi:10.3389/fpls.2019.00005)
Supplement: Supplementary file 2 [file Table_2.xls]

## Sheet: Table S2
	Table S2 The nucleotide variablity values among the 40 Populus plastomes
	P. adenopoda	P. alba	P. angustifolia	P. balsamifera	P. bolleana	P. cathayana	P. davidiana	P. deltoides	P. deltoides × nigra	P. euphratica	P. fremontii	P. gonggaensis	P. haoana	P. hopeiensis	P. ilicifolia	P. kangdingensis	P. koreana	P. lasiocarpa	P. laurifolia	P. mexicana	P. nigra	P. pruinosa	P. pseudoglauca	P. qamdoensis	P. qiongdaoensis	P. rotundifolia	P. rotundifolia var. duclouxiana	P. schneideri	P. simonii	P. szechuanica	P. szechuanica var. tibetica	P. tomentosa	P. tomentosa (NC)	P. tremula	P. tremula × alba	P. trichocarpa	P. trinervis	P. wilsonii	P. xiangchengensis	P. yunnanensis
P. adenopoda	*
P. alba	0.00142	*
P. angustifolia	0.00425	0.00406	*
P. balsamifera	0.00435	0.0041	0.0028	*
P. bolleana	0.00129	0.00046	0.00399	0.00402	*
P. cathayana	0.00337	0.00325	0.00357	0.00348	0.00322	*
P. davidiana	0.00263	0.00255	0.00521	0.00466	0.00245	0.0044	*
P. deltoides	0.00375	0.00352	0.0011	0.00214	0.00343	0.00298	0.00453	*
P. deltoides × nigra	0.00376	0.00352	0.0011	0.00215	0.00344	0.00299	0.00455	0	*
P. euphratica	0.00412	0.00403	0.00458	0.00484	0.004	0.00404	0.00536	0.0041	0.0041	*
P. fremontii	0.00391	0.00362	0.00125	0.00234	0.00355	0.00306	0.00466	0.00042	0.00043	0.0042	*
P. gonggaensis	0.00342	0.00339	0.0036	0.00346	0.00335	0.00124	0.00424	0.00296	0.00296	0.00401	0.003	*
P. haoana	0.00229	0.00219	0.00403	0.00413	0.00205	0.00328	0.00331	0.00349	0.0035	0.00402	0.00358	0.00327	*
P. hopeiensis	0.00263	0.00254	0.00516	0.00503	0.00245	0.00436	0.00014	0.00453	0.00455	0.0053	0.00465	0.0042	0.00332	*
P. ilicifolia	0.00484	0.0049	0.00545	0.00549	0.00484	0.00474	0.00252	0.005	0.005	0.00341	0.00501	0.00471	0.00477	0.0059	*
P. kangdingensis	0.00229	0.00219	0.00403	0.00413	0.00205	0.00328	0.00331	0.00349	0.0035	0.0053	0.00358	0.00327	0	0.00332	0.00477	*
P. koreana	0.00307	0.00305	0.00359	0.00319	0.00302	0.00094	0.00413	0.00272	0.00273	0.00381	0.00279	0.00082	0.00291	0.00409	0.00453	0.00291	*
P. lasiocarpa	0.00226	0.00216	0.00401	0.00407	0.00206	0.00319	0.00331	0.00346	0.00347	0.00397	0.00354	0.00318	0.00029	0.00332	0.00474	0.00029	0.00285	*
P. laurifolia	0.00399	0.0038	0.00438	0.00403	0.00374	0.00173	0.00497	0.00347	0.00347	0.00454	0.00353	0.00176	0.0038	0.00491	0.00564	0.0038	0.00171	0.00371	*
P. mexicana	0.00364	0.00355	0.00218	0.00227	0.00348	0.00297	0.00463	0.00158	0.00159	0.00414	0.0017	0.00299	0.00345	0.00463	0.00484	0.00345	0.00276	0.00341	0.00361	*
P. nigra	0.00139	0.00086	0.00412	0.0041	0.00079	0.00326	0.00278	0.00343	0.00345	0.00399	0.00357	0.00337	0.00213	0.00251	0.00496	0.00213	0.00388	0.00213	0.00389	0.00351	*
P. pruinosa	0.00364	0.00573	0.00644	0.00642	0.00575	0.00575	0.00705	0.00583	0.00583	0.0027	0.00589	0.00581	0.00577	0.00697	0.00532	0.00577	0.00575	0.00576	0.00628	0.00583	0.00388	*
P. pseudoglauca	0.00228	0.0022	0.00404	0.00414	0.00204	0.00331	0.00333	0.00351	0.00352	0.00405	0.0036	0.0033	3e-05	0.00334	0.00478	3e-05	0.00293	0.00029	0.0038	0.00345	0.00212	0.0058	*
P. qamdoensis	0.0022	0.00211	0.00398	0.00413	0.00201	0.00323	0.00326	0.00344	0.00345	0.00397	0.00353	0.00323	7e-05	0.00327	0.00471	7e-05	0.00286	0.00022	0.00373	0.00339	0.00208	0.00572	8e-05	*
P. qiongdaoensis	0.00163	0.00161	0.0042	0.00421	0.00154	0.00344	0.00202	0.00359	0.00361	0.00429	0.0037	0.00345	0.00232	0.00201	0.0049	0.00232	0.00308	0.00229	0.00395	0.0037	0.00158	0.00596	0.0023	0.00225	*
P. rotundifolia	0.0027	0.00265	0.00515	0.005	0.00253	0.0044	0.00032	0.00453	0.00454	0.00539	0.00467	0.0043	0.0034	0.00029	0.00597	0.0034	0.00416	0.0034	0.00508	0.0047	0.00271	0.00713	0.00341	0.00335	0.00206	*
P. rotundifolia var. duclouxiana	0.00263	0.00255	0.00514	0.005	0.00244	0.00435	6e-05	0.00451	0.00452	0.00527	0.00463	0.00419	0.00329	0.00012	0.0059	0.00329	0.00407	0.0033	0.00491	0.00461	0.00251	0.00696	0.00331	0.00325	0.00201	0.0003	*
P. schneideri	0.00226	0.00218	0.00403	0.00413	0.00203	0.0033	0.00332	0.0035	0.00352	0.00404	0.0036	0.00329	2e-05	0.00332	0.00477	2e-05	0.00292	0.00267	0.00379	0.00344	0.00211	0.00579	3e-05	6e-05	0.00229	0.0034	0.0033	*
P. simonii	0.00224	0.00215	0.00402	0.00414	0.00204	0.00322	0.00325	0.00347	0.00348	0.00394	0.00356	0.00322	9e-05	0.00325	0.00473	9e-05	0.00286	0.00024	0.00375	0.00342	0.00211	0.00568	0.00012	6e-05	0.00229	0.00333	0.00323	0.00011	*
P. szechuanica	0.00228	0.00218	0.00405	0.00423	0.00207	0.00327	0.00333	0.00349	0.0035	0.00402	0.00358	0.00327	0.00013	0.00334	0.00477	0.00013	0.0029	0.00026	0.00376	0.00344	0.00211	0.00577	0.00015	8e-05	0.00232	0.00342	0.00331	0.00014	0.0001	*
P. szechuanica var. tibetica	0.00229	0.00219	0.004	0.00408	0.00209	0.00322	0.00331	0.00346	0.00346	0.00399	0.00356	0.00322	0.00026	0.00332	0.00479	0.00026	0.0029	0.00015	0.00375	0.00342	0.00215	0.00573	0.00031	0.00023	0.00232	0.0034	0.0033	0.00029	0.00022	0.00026	*
P. tomentosa	0.00144	1e-05	0.00409	0.00412	0.00047	0.00327	0.00254	0.00354	0.00355	0.00404	0.00365	0.00341	0.00218	0.00254	0.00307	0.00218	0.00304	0.00216	0.00383	0.00358	0.00088	0.00575	0.00218	0.00211	0.0016	0.00265	0.00254	0.00217	0.00214	0.00217	0.00218	*
P. tomentosa (NC)	0.00142	0	0.00407	0.00411	0.00046	0.00325	0.00256	0.00352	0.00353	0.00403	0.00363	0.00339	0.0022	0.00255	0.0049	0.0022	0.00306	0.00217	0.00382	0.00356	0.00087	0.00574	0.0022	0.00212	0.00266	0.00266	0.00255	0.00218	0.00216	0.00218	0.0022	1e-05	*
P. tremula	0.00229	0.00223	0.00475	0.00467	0.00211	0.00381	0.0051	0.00414	0.00416	0.00488	0.00423	0.00389	0.00275	0.00259	0.00536	0.00275	0.00349	0.0028	0.00438	0.00412	0.00219	0.00654	0.00275	0.00272	0.0017	0.00262	0.0026	0.00275	0.00273	0.0028	0.00281	0.00223	0.00224	*
P. tremula × alba	0.00295	0.00265	0.00515	0.00507	0.00252	0.00427	0.00259	0.00451	0.00453	0.00524	0.00463	0.00434	0.00329	0.00278	0.00582	0.00329	0.00408	0.0033	0.00483	0.00458	0.00263	0.00695	0.00327	0.00323	0.00206	0.00284	0.00279	0.00327	0.00326	0.0033	0.00334	0.00265	0.00266	0.00061	*
P. trichocarpa	0.0036	0.00353	0.00204	0.00204	0.00347	0.00291	0.0046	0.00145	0.00145	0.00423	0.0016	0.00297	0.0034	0.00459	0.00484	0.0034	0.00264	0.00334	0.00358	0.00138	0.00345	0.00598	0.00341	0.00335	0.00359	0.0047	0.00457	0.0034	0.00336	0.0034	0.00335	0.00355	0.00355	0.00404	0.00457	*
P. trinervis	0.00345	0.0034	0.00362	0.00347	0.00337	0.00126	0.00422	0.00298	0.00298	0.00402	0.00303	2e-05	0.00326	0.00419	0.0047	0.00326	0.00081	0.00316	0.00179	0.00302	0.0034	0.00312	0.00329	0.00322	0.00346	0.0043	0.00418	0.00327	0.00321	0.00325	0.0032	0.0034	0.00341	0.00389	0.00434	0.00298	*
P. wilsonii	0.00468	0.00459	0.00484	0.00467	0.00451	0.00368	0.00573	0.00426	0.00426	0.00539	0.00431	0.00358	0.00447	0.00568	0.00615	0.00447	0.00312	0.00443	0.00424	0.0043	0.00458	0.0071	0.00448	0.00444	0.0047	0.00572	0.00568	0.00445	0.00446	0.00446	0.00445	0.00461	0.00459	0.00516	0.0057	0.00429	0.00362	*
P. xiangchengensis	0.00344	0.00339	0.0036	0.00347	0.00336	0.00124	0.00424	0.00296	0.00296	0.00401	0.00301	0	0.00328	0.00421	0.00471	0.00284	0.00083	0.00318	0.00177	0.003	0.00339	0.00582	0.0033	0.00324	0.00347	0.00432	0.0042	0.00329	0.00323	0.00327	0.00322	0.00342	0.0034	0.00391	0.00436	0.00298	2e-05	0.0036	*
P. yunnanensis	0.00222	0.00212	0.004	0.00414	0.00202	0.00324	0.00328	0.00346	0.00347	0.00397	0.00355	0.00324	8e-05	0.00328	0.00472	8e-05	0.00288	0.00022	0.00374	0.00341	0.00209	0.00572	9e-05	1e-05	0.00226	0.00336	0.00326	8e-05	4e-05	7e-05	0.00023	0.00211	0.00213	0.00272	0.00323	0.00336	0.00323	0.00446	0.00325	*
